# Supplementary material
Source: PubMed Central journal article supplement (PMC7968761)
Supplement: 14-01295.pdf [file 14-01295.pdf]

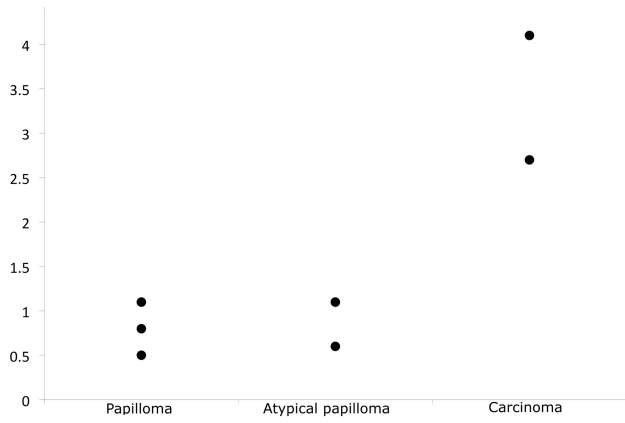

**ON-LINE FIG 1.** Maximal relative cerebral blood flow of papillomas, atypical papillomas, and carcinomas by using ASL. Maximal rCBF is normalized to the contralateral gray matter. Two papillomas and 2 atypical papillomas had the same value (1.1) and share the same point in each row.

**On-line Table 1: Histopathologic data and perfusion values using arterial spin-labeling and dynamic susceptibility contrast perfusion-weighted imaging**

| Patient | Age (yr/mo) | Diagnosis              | Arborescent Microvascular Architecture |     | Endothelial Capillary Proliferation | Vascular Necrosis | Vessels/0.5 mm <sup>2</sup> | ASL CBF | ASL CBFmax | ASL rCBF | ASL rCBFmax | DSC rCBV | DSC rCBVmax | DSC rCBF | DSC rCBFmax |
|---------|-------------|------------------------|----------------------------------------|-----|-------------------------------------|-------------------|-----------------------------|---------|------------|----------|-------------|----------|-------------|----------|-------------|
|         |             |                        | Yes                                    | No  |                                     |                   |                             |         |            |          |             |          |             |          |             |
| 1       | 1/1         | Papilloma              | Yes                                    | No  | No                                  | No                | 54                          | 33      | 59         | 0.3      | 0.5         | 2.5      | 3.2         | 0.4      | 1.0         |
| 2       | 1/9         | Papilloma              | Yes                                    | No  | No                                  | No                | 36                          | 42      | 93         | 0.5      | 1.1         | —        | —           | —        | —           |
| 3       | 5/11        | Papilloma              | Yes                                    | No  | No                                  | No                | 47                          | 73      | 93         | 0.6      | 0.8         | —        | —           | —        | —           |
| 4       | 0/7         | Papilloma              | Yes                                    | No  | No                                  | No                | 96 <sup>a</sup>             | 31      | 87         | 0.4      | 1.1         | —        | —           | —        | —           |
| 5       | 0/9         | Atypical papilloma     | Yes                                    | No  | No                                  | No                | 22                          | 10      | 15         | 0.4      | 0.6         | —        | —           | —        | —           |
| 6       | 1/5         | Atypical papilloma     | Yes                                    | No  | No                                  | Yes               | 54                          | 45      | 110        | 0.4      | 1.1         | 3.2      | 8.1         | 1.1      | 2.5         |
| 7       | 0/8         | Atypical papilloma     | Yes/No                                 | No  | No                                  | Yes               | 53                          | 51      | 111        | 0.5      | 1.1         | 1.2      | 3.9         | 0.7      | 1.3         |
| 8       | 3/7         | Carcinoma              | No                                     | Yes | Yes                                 | Yes               | 60                          | 90      | 172        | 1.4      | 2.7         | 5.8      | 12.6        | 1.9      | 4.2         |
| 9       | 14/1        | Carcinoma              | No                                     | Yes | Yes                                 | Yes               | 96                          | 140     | 306        | 1.9      | 4.1         | —        | —           | —        | —           |
| 10      | 2/1         | Carcinoma              | Yes                                    | No  | No                                  | Yes               | 25                          | —       | —          | —        | —           | 3.6      | 7.0         | 1.0      | 1.8         |
| 11      | 2/2         | Carcinoma              | No                                     | Yes | Yes                                 | Yes               | 90                          | —       | —          | —        | —           | 4.6      | 8.4         | 1.1      | 1.9         |
| 12      | 2/3         | Carcinoma              | No                                     | Yes | Yes                                 | Yes               | 114                         | —       | —          | —        | —           | 2.1      | 4.5         | 0.9      | 2.0         |
| 13      | 16/7        | Carcinoma <sup>b</sup> | No                                     | No  | No                                  | No                | 43                          | —       | —          | —        | —           | 1.7      | 2.5         | 0.5      | 0.8         |

**Note:**—Values with “max” indicate value is measured with a ROI placed in the most perfused area of the lesion.

<sup>a</sup> Probably overestimated due to crushing artifacts.

<sup>b</sup> Very different morphology with calcifications and hyalinized vessels.

**On-line Table 2: Statistical significance using the Mann-Whitney test**

|                             | Vessels/0.5 mm <sup>2</sup> | ASL CBF | ASL CBFmax | ASL rCBF | ASL rCBFmax | DSC rCBV | DSC rCBVmax | DSC rCBF | DSC rCBFmax |
|-----------------------------|-----------------------------|---------|------------|----------|-------------|----------|-------------|----------|-------------|
| <i>P</i> value <sup>a</sup> | .16 <sup>b</sup>            | .056    | .056       | .028     | .056        | .393     | .571        | .429     | .786        |

<sup>a</sup> Carcinoma vs (papilloma + atypical papilloma).

<sup>b</sup> Excluding patient 4.
